# Supplementary material
Source: MDPI journal article supplement (https://www.mdpi.com/2073-4441/14/12/1847)
Supplement: s1 [file s1]

# Supplementary Materials

**Table S1.** The  $2\theta$ , interlayer spacing (d) and crystal size (CS) of different experimental groups in the experiment.

| Times         | Control | M      | LAA    | LMB    | LAA+M  | LMB+M  | Original LAA | Original LMB |
|---------------|---------|--------|--------|--------|--------|--------|--------------|--------------|
| $2\theta$ (°) | 29.578  | 29.493 | 29.488 | 29.477 | 29.475 | 29.468 | 26.691       | 26.662       |
| d (nm)        | 0.097   | 0.094  | 0.094  | 0.093  | 0.093  | 0.093  | 0.110        | 0.111        |
| CS (nm)       | 51.6    | 57.8   | 42     | 43.4   | 41.5   | 46.3   | 29.4         | 13.5         |

**Table S2.** The release and accumulation rates (r) of P in sediments cores during the experiment.

| Experiment Group | NH <sub>4</sub> Cl-P | BD-SRP | BD-ORP | NaOH-SRP | NaOH-ORP | HCl-SRP | HCl-ORP | Res-P |
|------------------|----------------------|--------|--------|----------|----------|---------|---------|-------|
| Control          | -42%                 | -23%   | -43%   | 45%      | 2%       | 22%     | 146%    | 0%    |
| M                | -48%                 | 1%     | -67%   | 10%      | 42%      | 10%     | 61%     | -2%   |
| LAA              | -34%                 | -28%   | -41%   | 22%      | 13%      | 5%      | -29%    | -10%  |
| LMC              | -31%                 | -49%   | -31%   | 12%      | 98%      | 21%     | 544%    | -10%  |
| LAA+M            | -32%                 | -32%   | -16%   | 28%      | 93%      | -1%     | 7%      | -6%   |
| LMC+M            | -16%                 | -31%   | 3%     | 5%       | 23%      | 24%     | -43%    | 5%    |

**Table S3.** The fast-release and sedimentation rates ( $R_1$ ) of different P forms in sediments cores during the experiment.

| Experiment Group |         | NH <sub>4</sub> Cl-P | BD-SRP | BD-ORP | NaOH-SRP | NaOH-ORP | HCl-SRP | HCl-ORP | Res-P |
|------------------|---------|----------------------|--------|--------|----------|----------|---------|---------|-------|
| 30-day           | Control | 1%                   | 14%    | 7%     | 2%       | -2%      | 1%      | -4%     | 1%    |
|                  | M       | 0.1%                 | 7%     | 33%    | 5%       | 2%       | 2%      | -3%     | 12%   |
|                  | LAA     | -1%                  | -6%    | 31%    | -2%      | -16%     | 3%      | -4%     | -5%   |
|                  | LMB     | -1%                  | -12%   | -4%    | -8%      | -13%     | -7%     | 15%     | 5%    |
|                  | LAA+M   | -1%                  | -7%    | -13%   | -7%      | -5%      | 12%     | 10%     | -1%   |
|                  | LMB+M   | -1%                  | -9%    | -1%    | -14%     | 2%       | 11%     | 8%      | -19%  |
| 60-day           | Control | 5%                   | 13%    | 11%    | 23%      | 129%     | 7%      | -28%    | 16%   |
|                  | M       | 0.2%                 | -4%    | -3%    | -7%      | 29%      | -1%     | 5%      | 7%    |
|                  | LAA     | 0.5%                 | -1%    | 5%     | 1%       | -3%      | -1%     | -0.4%   | -11%  |
|                  | LMB     | 1%                   | 0.1%   | -8%    | -41%     | -10%     | 30%     | 1%      | 21%   |
|                  | LAA+M   | -0.3%                | -5%    | -0.1%  | -10%     | -68%     | 12%     | 4%      | -2%   |
|                  | LMB+M   | -1%                  | 2%     | -5%    | -5%      | -8%      | 10%     | 3%      | -1%   |

**Table S4.** The flow-release and sedimentation rates ( $R_2$ ) of different P forms in sediments cores during the experiment.

| Experiment Group |         | NH <sub>4</sub> Cl-P | BD-SRP | BD-ORP | NaOH-SRP | NaOH-ORP | HCl-SRP | HCl-ORP | Res-P |
|------------------|---------|----------------------|--------|--------|----------|----------|---------|---------|-------|
| 30-day           | Control | 1%                   | 14%    | 28%    | −26%     | 1%       | 9%      | −14%    | 6%    |
|                  | M       | 1%                   | 11%    | 41%    | −7%      | −9%      | 10%     | −8%     | 12%   |
|                  | LAA     | −1%                  | −2%    | 26%    | −18%     | −36%     | 6%      | −1%     | 9%    |
|                  | LMB     | −1%                  | −1%    | −3%    | −23%     | −33%     | −14%    | 17%     | 9%    |
|                  | LAA+M   | −0.4%                | −5%    | 8%     | −35%     | 32%      | 12%     | 4%      | −3%   |
|                  | LMB+M   | −2%                  | −26%   | 24%    | −2%      | 9%       | 4%      | 24%     | −9%   |
| 60-day           | Control | 7%                   | −5%    | 55%    | 62%      | −37%     | 4%      | −8%     | 3%    |
|                  | M       | 1%                   | −22%   | 25%    | 2%       | 30%      | −4%     | 9%      | 8%    |
|                  | LAA     | 1%                   | −15%   | 18%    | −26%     | 24%      | 6%      | 2%      | −8%   |
|                  | LMB     | −0.1%                | −5%    | 1%     | −25%     | 14%      | 38%     | 2%      | 15%   |
|                  | LAA+M   | −0.3%                | −5%    | −0.1%  | −10%     | −68%     | 12%     | 4%      | −2%   |
|                  | LMB+M   | −1%                  | 2%     | −5%    | −5%      | −8%      | 10%     | 3%      | −1%   |

**Table S5.** The increase or decrease rates of different P forms in the sediment cores of different treatment groups relative to the control group during the experiment.

| Experiment Group |         | NH <sub>4</sub> Cl-P | BD-SRP | BD-ORP | NaOH-SRP | NaOH-ORP | HCl-SRP | HCl-ORP | Res-P |
|------------------|---------|----------------------|--------|--------|----------|----------|---------|---------|-------|
| 30-day           | Control | −8%                  | −15%   | 8%     | 5%       | 12%      | −4%     | −38%    | −2%   |
|                  | M       | 20%                  | −9%    | 15%    | 4%       | 15%      | −26%    | 46%     | −17%  |
|                  | LAA     | 36%                  | −36%   | 29%    | −8%      | 40%      | −7%     | −109%   | −8%   |
|                  | LMB     | 28%                  | 4%     | 23%    | 6%       | 13%      | −25%    | −161%   | −13%  |
|                  | LAA+M   | 20%                  | −15%   | 4%     | −1%      | 27%      | −10%    | −169%   | 0%    |
|                  | LMB+M   | −8%                  | −15%   | 8%     | 5%       | 12%      | −4%     | −38%    | −2%   |
| 60-day           | Control | 0.3%                 | −40%   | 49%    | 24%      | 15%      | 10%     | −225%   | 5%    |
|                  | M       | 8%                   | 8%     | −2%    | 14%      | 4%       | −8%     | −67%    | −3%   |
|                  | LAA     | 21%                  | 16%    | 6%     | 15%      | −6%      | −3%     | −479%   | 5%    |
|                  | LMB     | 14%                  | 16%    | −15%   | 8%       | −31%     | −1%     | −378%   | −6%   |
|                  | LAA+M   | −19%                 | −12%   | −74%   | 25%      | 16%      | −12%    | −220%   | −3%   |
|                  | LMB+M   | 0.3%                 | −40%   | 49%    | 24%      | 15%      | 10%     | −225%   | 5%    |

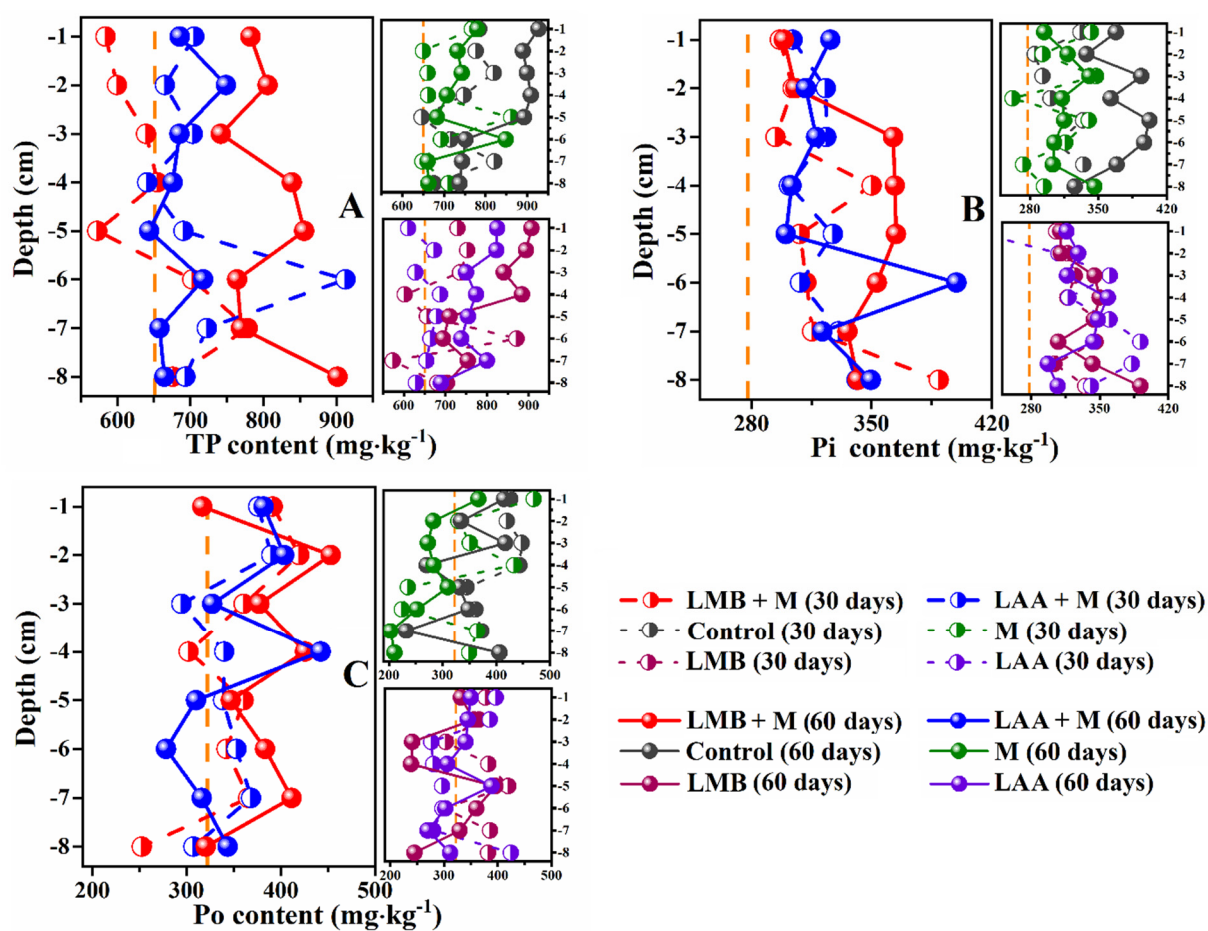

**Figure S1.** Vertical distribution of P content in the sediments of the different treatments during the experiment. (A), (B), and (C) represent the content changes of TP, Pi, and Po in the sediments, and each graph consists of three distinct subgraphs. The left subgraphs represent LAA+M and LMB+M groups, respectively. The upper right subgraphs represent control and M groups, respectively. The lower right subgraphs represent LAA and LMB groups, respectively. All data are three replicates.

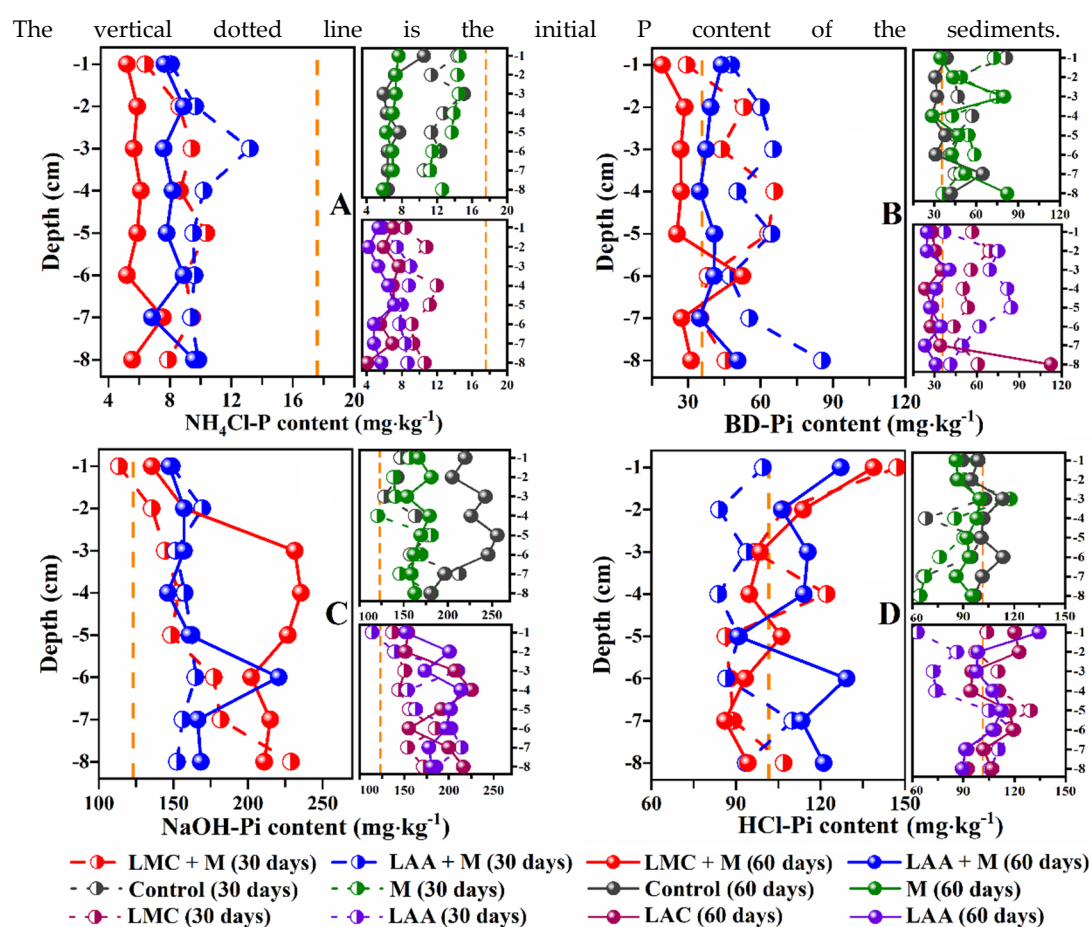

**Figure S2.** Vertical distribution of P content in sediments of different treatments during the experiment. (A), (B), (C), and (D) represent the changes in the content of inorganic NH<sub>4</sub>Cl-P, BD-Pi, NaOH-Pi and HCl-Pi in the sediments, respectively. Each graph consists of three distinct subgraphs. The left subgraphs represent LAA+M and LMC+M groups, respectively. The upper right subgraphs represent control and M groups, respectively. The lower right subgraphs represent LAA and LMC groups, respectively. All data are triplicates. The vertical dashed line is the initial P content of the sediments.

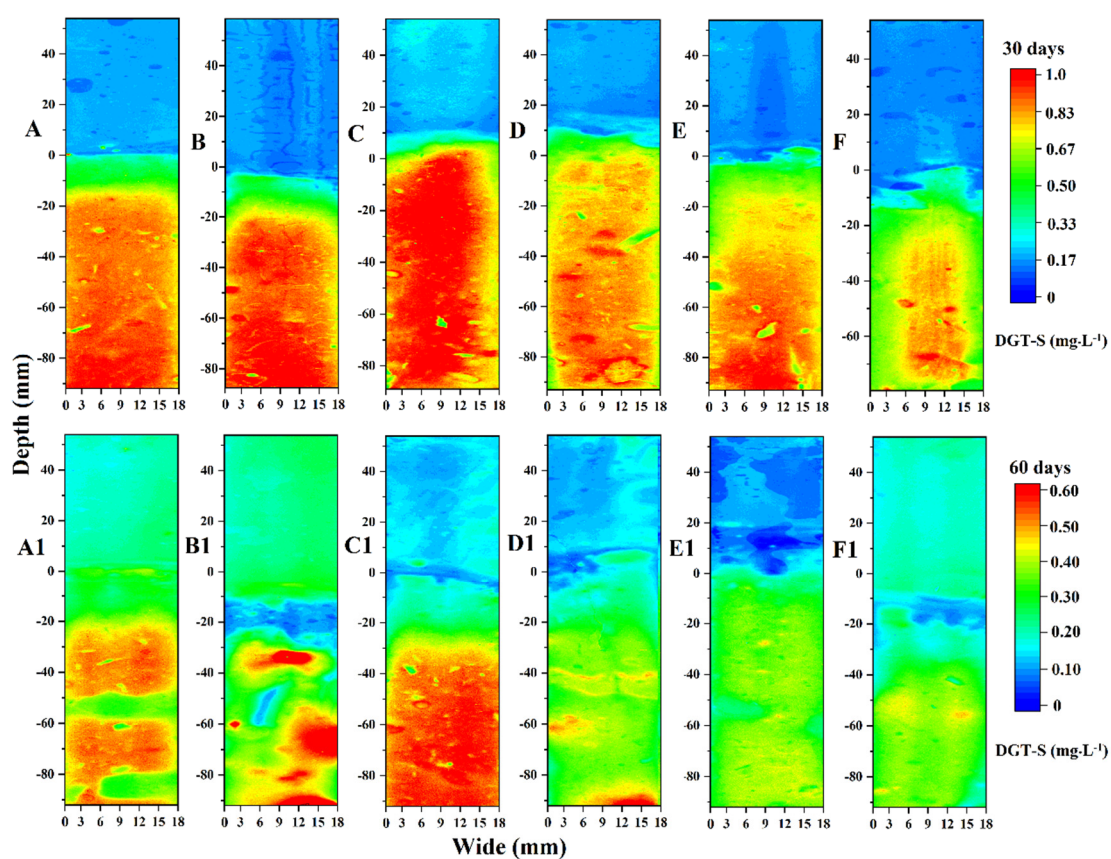

**Figure S3.** Vertical variation of DGT-labile S in sediments during the experiment. (A), (B), (C), (D), (E), and (F) are the changes of DGT-labile S in the sediments of the Control, M, LAA, LMB, LAA+M and LMB+M repaired on the 30-day, respectively. (A1), (B1), (C1), (D1), (E1), and (F1) are the changes of DGT-labile S in the sediments of the Control, M, LAA, LMB, LAA+M and LMB+M repaired on the 60-day, respectively.

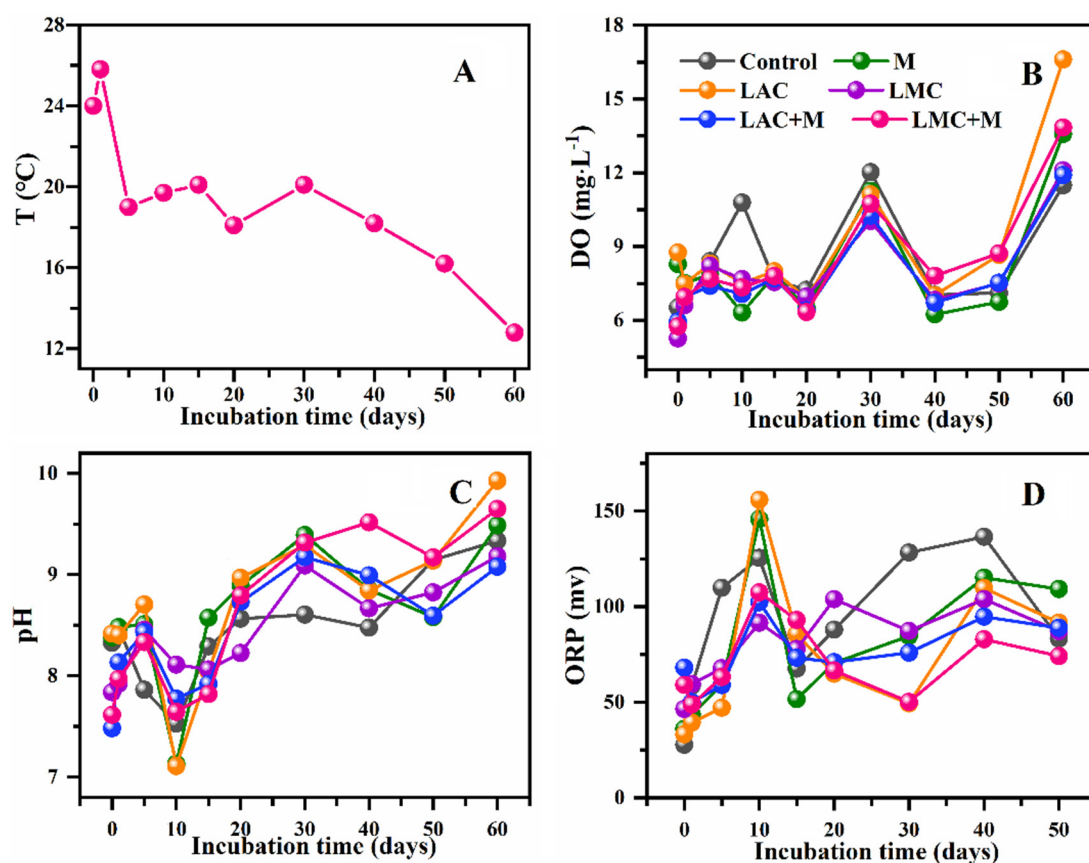

**Figure S4.** Water quality parameters. (A), (B), (C) and (D) respectively represent the overlying water temperature (T), dissolved oxygen (DO), pH and redox potential (ORP) changes during the experiment.
